# Supplementary material for: Comparison of Antioxidant Properties of a Conjugate of Taxifolin with Glyoxylic Acid and Selected Flavonoids
Source: MDPI journal article supplement (doi:10.3390/antiox10081262), 2021-08-08
Supplement: s1 [file s1]

# Supporting Information for Comparison of Antioxidant Properties of a Conjugate of Taxifolin with Glyoxylic Acid and Selected Flavonoids

V. S. Shubina, V. I. Kozina and Yu. V. Shatalin

Institute of Theoretical and Experimental Biophysics, Russian Academy of Sciences, Institutskaya 3,  
142290 Pushchino, Russia

For a mixture containing two compounds that compete for binding to iron(II) ions, the following equilibria are established:

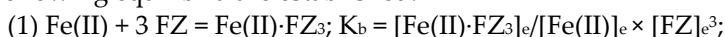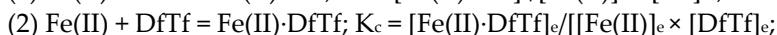

where FZ is ferrozine; DfTf is a conjugate of taxifolin with glyoxylic acid;  $K_b$  and  $K_c$  are the binding constant of Fe(II) and ferrozine and Fe(II) and DfTf, respectively; and  $[...]_e$  is the equilibrium concentration of each species.

The ratio of the binding constants is expressed as:

$$K_b/K_c = ([\text{Fe(II)} \cdot \text{FZ}_3]_e / [\text{Fe(II)} \cdot \text{DfTf}]_e) \times ([\text{DfTf}]_e / [\text{FZ}]_e^3) \Rightarrow$$

$$K_c = K_b \times ([\text{FZ}]_e^3 / [\text{DfTf}]_e) \times ([\text{Fe(II)} \cdot \text{DfTf}]_e / [\text{Fe(II)} \cdot \text{FZ}_3]_e).$$

where  $K_b = 3.65 \times 10^{15} \text{ M}^{-2}$  [56]

In the case that equal amounts of  $[\text{Fe(II)} \cdot \text{DfTf}]$  and  $[\text{Fe(II)} \cdot \text{FZ}_3]$  complexes are formed, we obtain:

$[\text{Fe(II)} \cdot \text{FZ}_3]_e \approx [\text{Fe(II)} \cdot \text{DfTf}]_e \approx 50 \times 10^{-6} \text{ M}$ ;  $[\text{DfTf}]_0 = 404.75 \times 10^{-6} \text{ M}$  (the initial concentration of DfTf was found by interpolating the graph on Fig. 4);

Thus,  $[\text{DfTf}]_e \approx [\text{DfTf}]_0 - [\text{Fe(II)} \cdot \text{DfTf}]_e = 404.75 \times 10^{-6} \text{ M} - 50 \times 10^{-6} \text{ M} = 354.75 \times 10^{-6} \text{ M}$ .

Taking into account that the initial concentration of ferrozine ( $[\text{FZ}]_0$ ) was  $333 \times 10^{-6} \text{ M}$ , we have:

$$[\text{FZ}]_e \approx [\text{FZ}]_0 - 3 \times [\text{Fe(II)} \cdot \text{FZ}_3]_e = 333 \times 10^{-6} \text{ M} - 3 \times 50 \times 10^{-6} \text{ M} = 183 \times 10^{-6} \text{ M}.$$

Thus,  $K_c = 6.3 \times 10^7 \text{ M}^{-1}$ .
